# Supplementary material for: Assessing the Role of Livestock in Big Cat Prey Choice Using Spatiotemporal Availability Patterns
Source: PLoS One. 2016 Apr 11;11(4):e0153439. doi: 10.1371/journal.pone.0153439 (PMC4827856; doi:10.1371/journal.pone.0153439)
Supplement: S1 Table — (XLSX) [file pone.0153439.s003.xlsx]

## Sheet: Sheet 1
	Shaerbafi (2011) data		Pooled data
Species	n scats		n scats	CFO
Wild boar	57		95	0.56
Urial sheep	11		32	0.19
Bezoar goat	23		22	0.13
Livestock	11		21	0.12
	102		170
